# Supplementary material
Source: Springer Nature journal article supplement (https://www.springermedizin.de/resource/supplementary/12890_2013_483_MOESM7_ESM.pdf/9505586)

**Fig. 3-B: Cumulative survival after diagnosis of secondary PAP with or without %DLco < 44% in patients with MDS (n=17)**

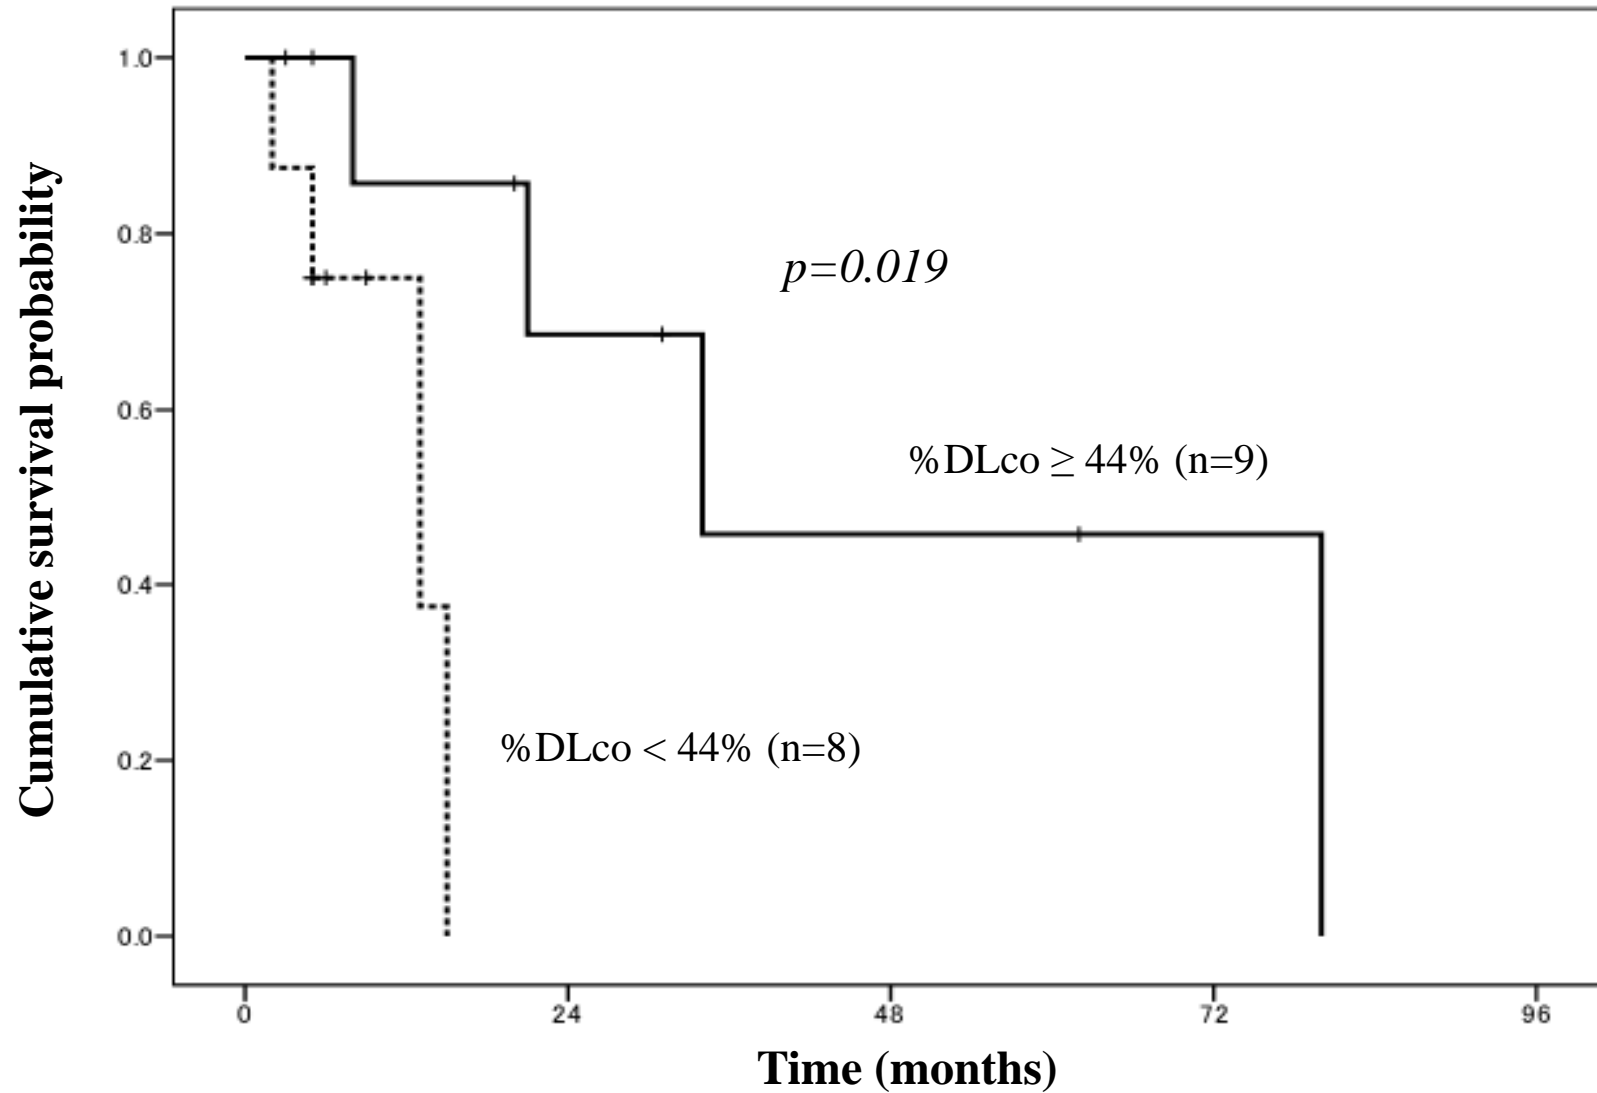

Supplement: MOESM7 [file 9505586]
